# Supplementary material for: Fungal Planet description sheets: 951–1041
Source: PubMed Central journal article supplement — Persoonia. 2019 Dec 18;43:223–425. doi: 10.3767/persoonia.2019.43.06 (PMC7085856; doi:10.3767/persoonia.2019.43.06), 2019-12-18
Supplement: per-43-223-SF2.pdf [file per-43-223-SF2.pdf]

Fungal Planet 1006 – *Cladosporium fildesense*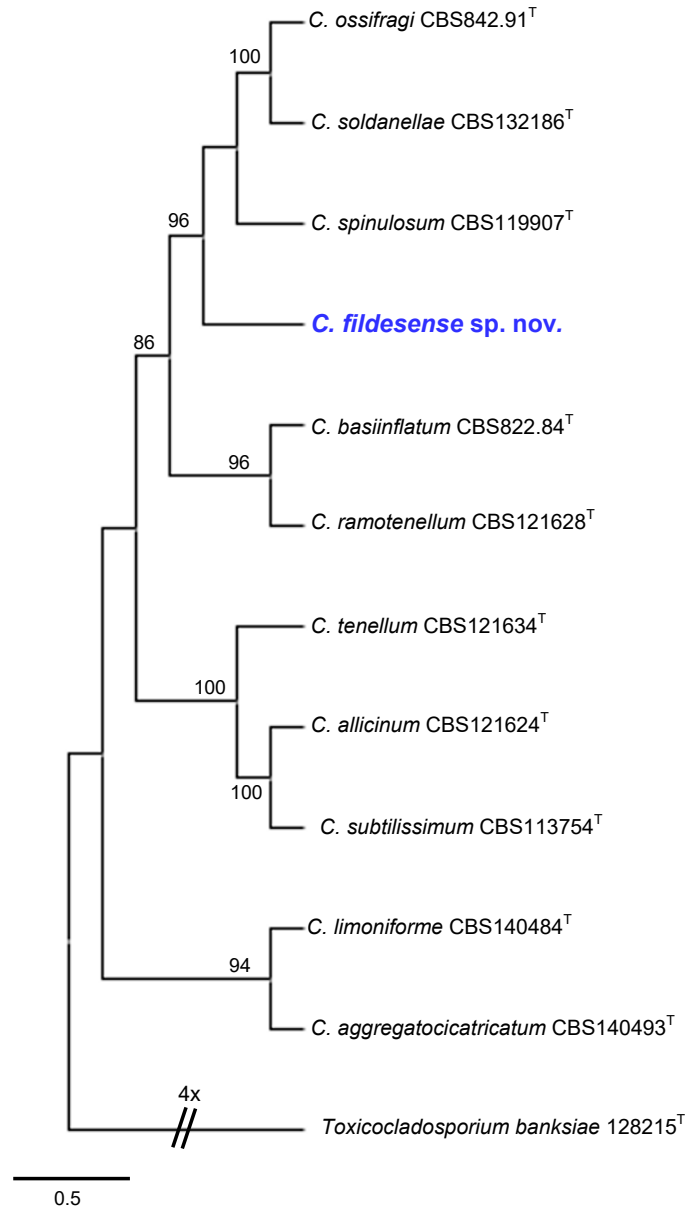

**FP1006** Maximum likelihood (ML) phylogeny of *C. fildesense* and related species within *C. herbarum* complex was inferred from the combined analysis of ITS, *actA* and *tef1* sequences (Bensch et al. 2015). Alignments and ML analyses were performed with MegaX (Kumar et al. 2018). Model used was HKY + G + I. Bootstrap support values (> 50 %) are shown at the nodes (bootstrap iterations = 1000). The tree was rooted using combined ITS and *actA* sequences from *Toxicocladosporium banksiae* CBS 128215 (type strain).
