# Supplementary material for: Fungal Planet description sheets: 951–1041
Source: PubMed Central journal article supplement — Persoonia. 2019 Dec 18;43:223–425. doi: 10.3767/persoonia.2019.43.06 (PMC7085856; doi:10.3767/persoonia.2019.43.06), 2019-12-18
Supplement: per-43-223-SF3.pdf [file per-43-223-SF3.pdf]

Fungal Planet 1007-1 – *Clavulina iris*

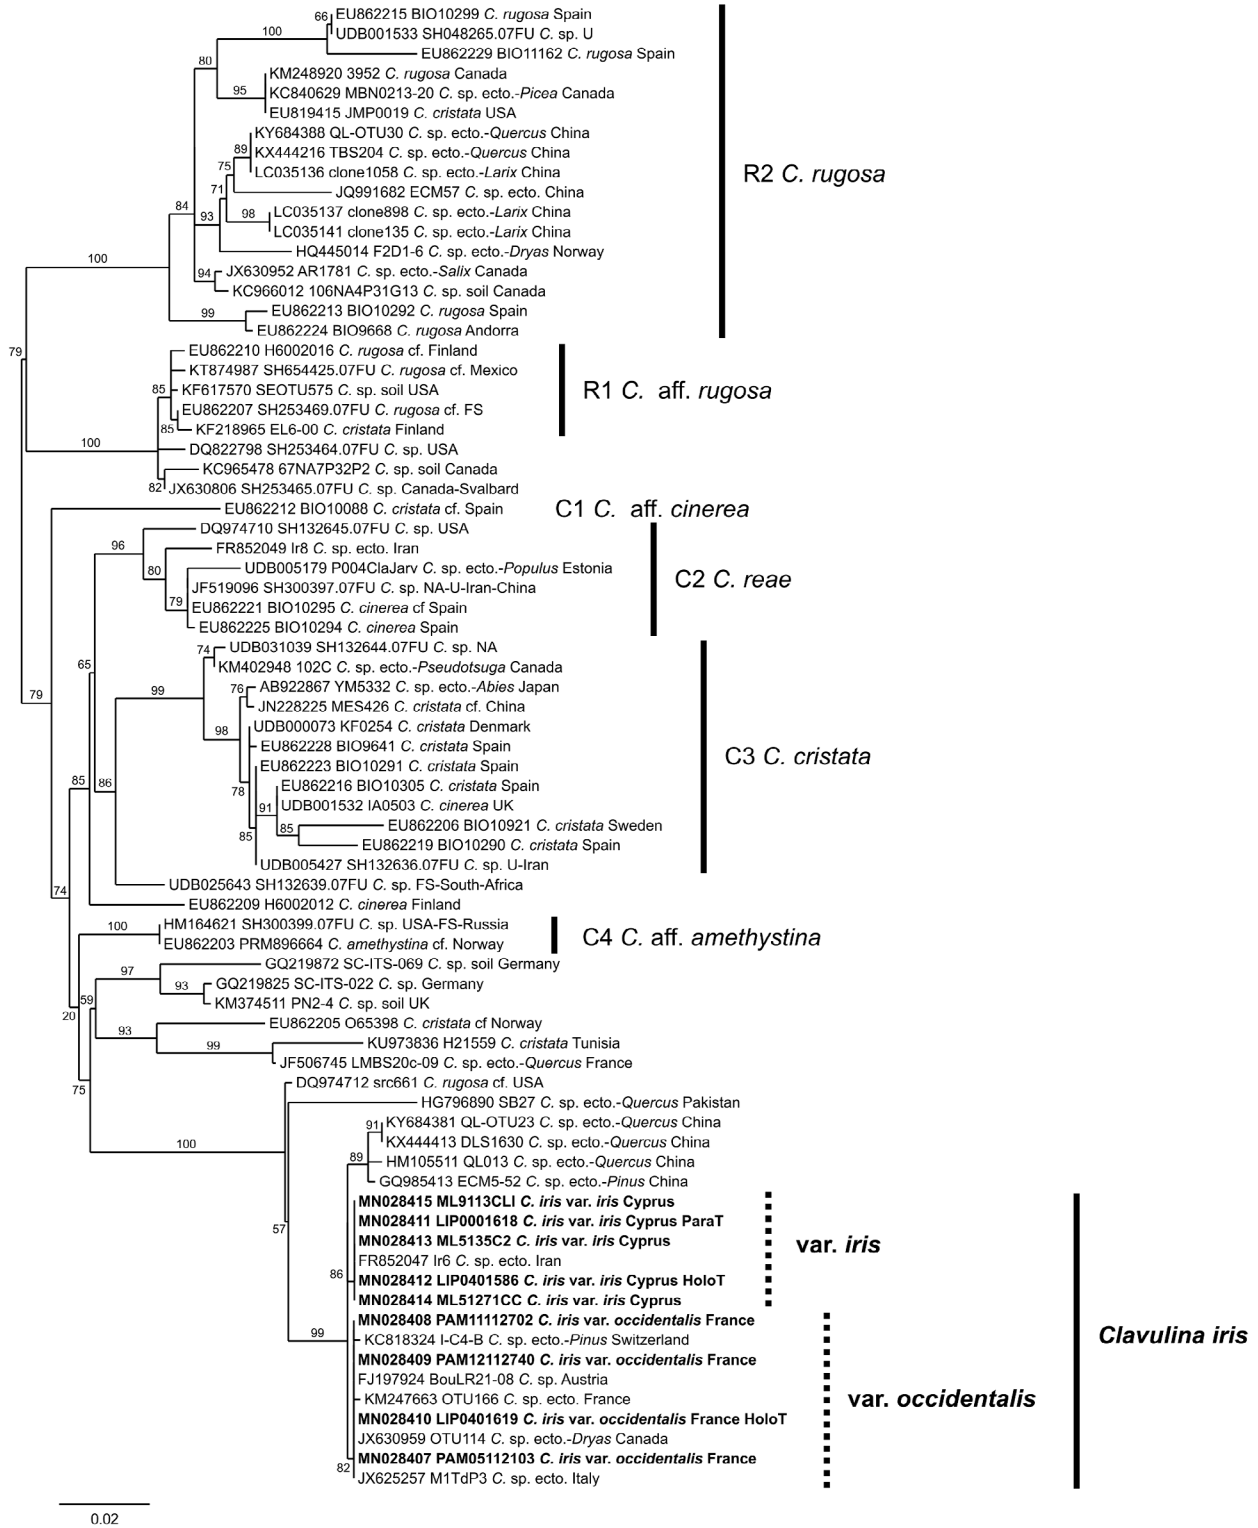

FP1007-1 ITS phylogeny of *Clavulina*. Alignment with Muscle 3.7, Maximum likelihood phylogenetic analysis with PhyML 3.0, tree building with TreeDyn 198.3, all performed online at phylogeny.fr (Dereeper et al. 2008). Lineage supports indicated on each branch are SH-aLRT values, significant when > 0.8.
