# Supplementary material for: Fungal Planet description sheets: 951–1041
Source: PubMed Central journal article supplement — Persoonia. 2019 Dec 18;43:223–425. doi: 10.3767/persoonia.2019.43.06 (PMC7085856; doi:10.3767/persoonia.2019.43.06), 2019-12-18
Supplement: per-43-223-SF4.pdf [file per-43-223-SF4.pdf]

**Fungal Planet 1007-2 – *Clavulina iris***

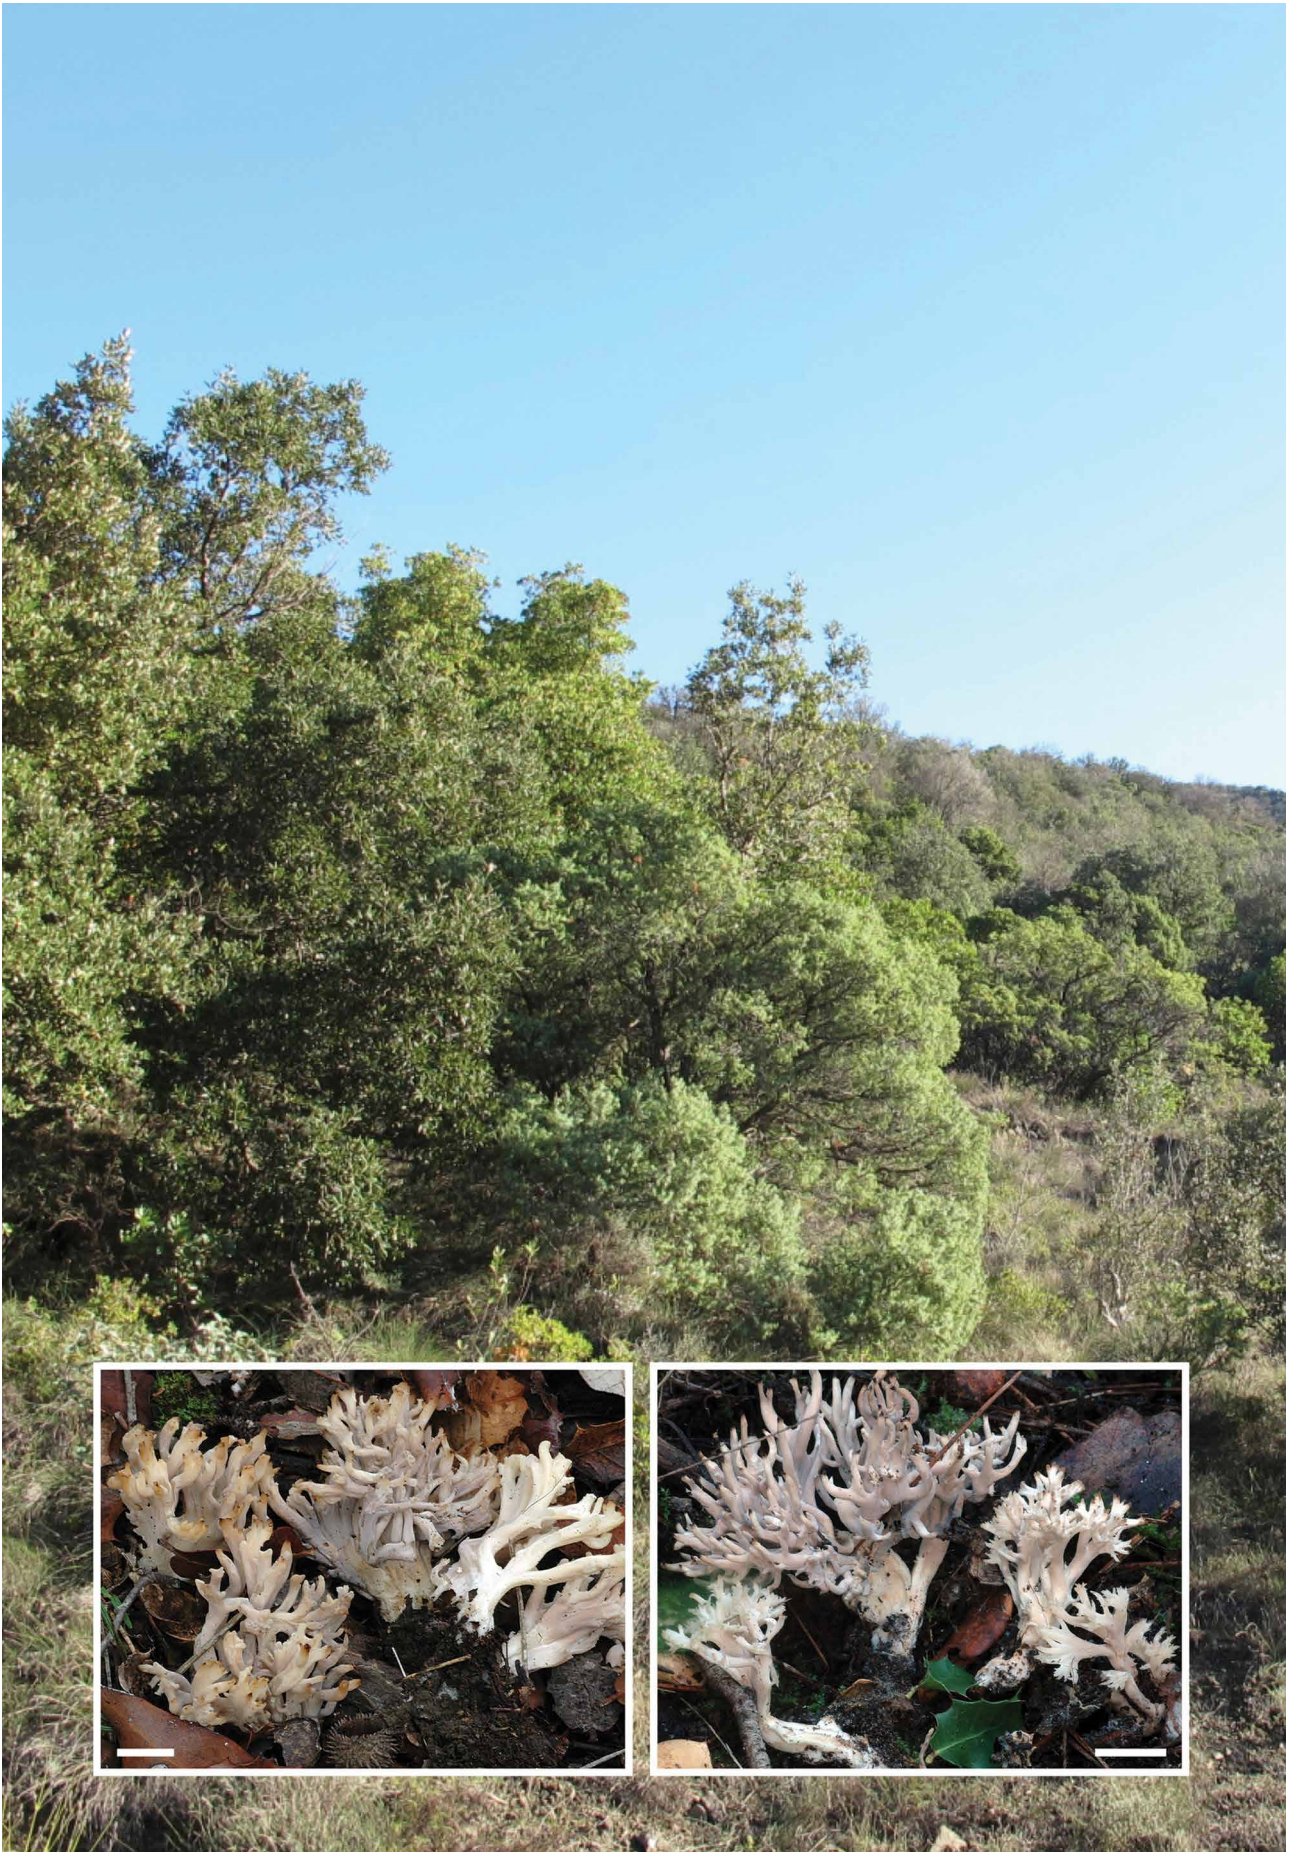

**FP1007-2** *Clavulina iris* var. *occidentalis*. Collection area at Pézilla-de-Conflent (France). From left to right: holotype coll. *in situ* LIP 0401619, and coll. PAM11112702. Scale bars = 10 mm.
