# Supplementary material for: Fungal Planet description sheets: 951–1041
Source: PubMed Central journal article supplement — Persoonia. 2019 Dec 18;43:223–425. doi: 10.3767/persoonia.2019.43.06 (PMC7085856; doi:10.3767/persoonia.2019.43.06), 2019-12-18
Supplement: per-43-223-SF6.pdf [file per-43-223-SF6.pdf]

Fungal Planet 1017 – *Hermetothecium mikaniae-micranthae*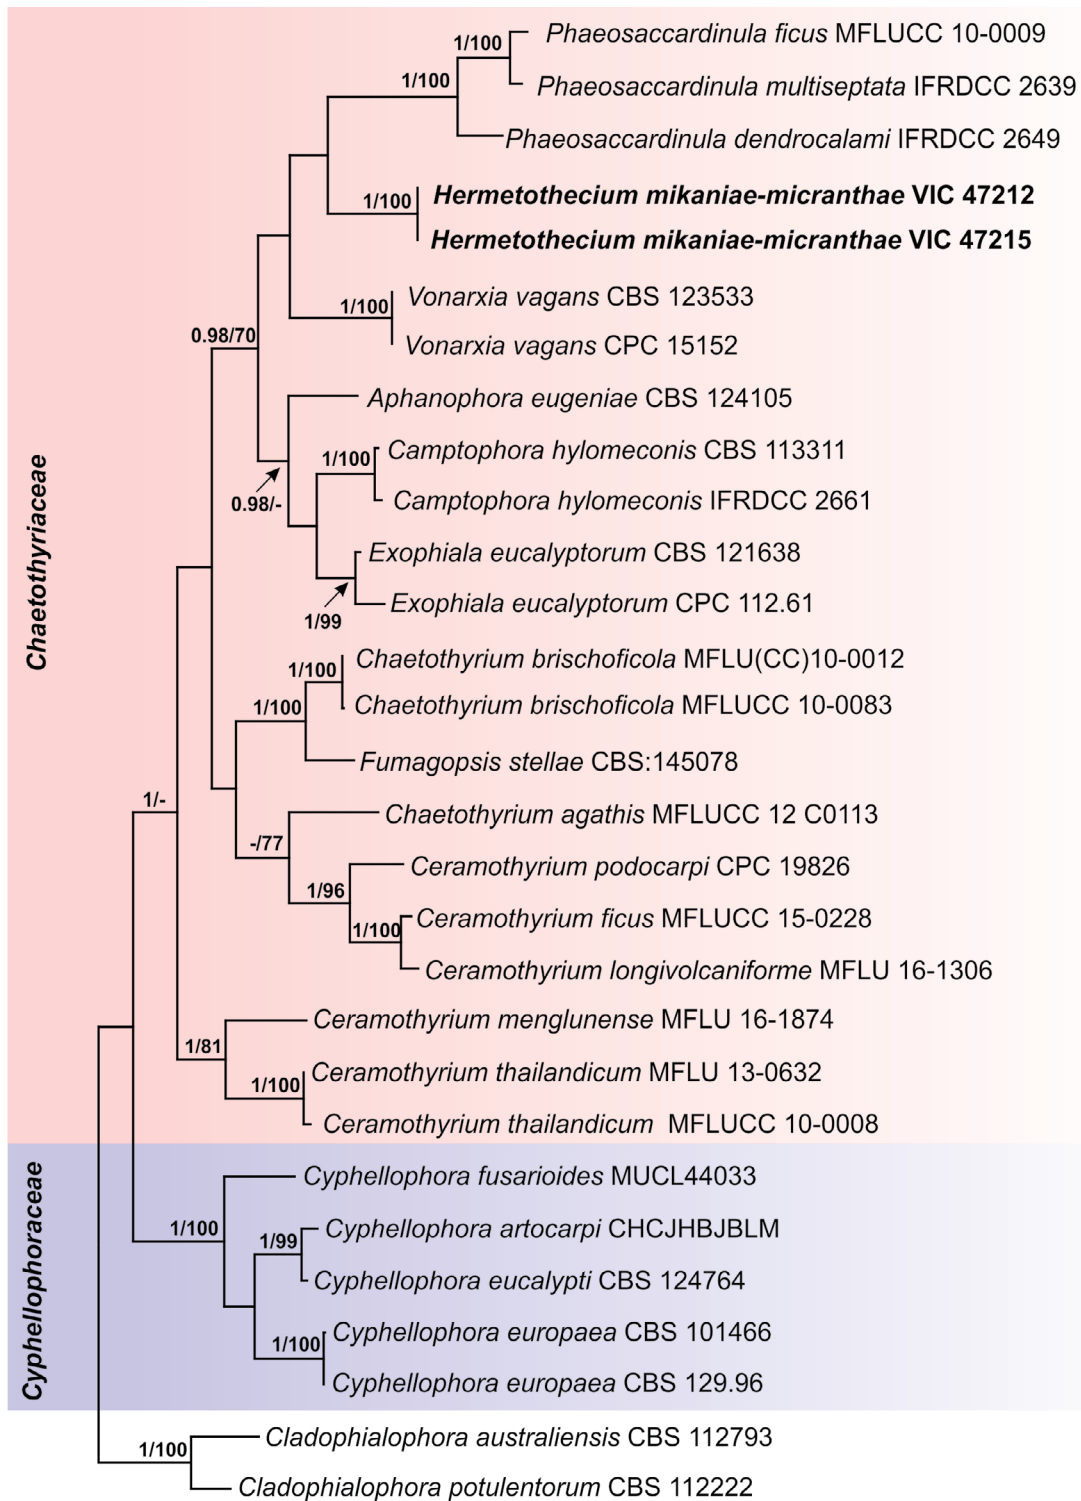

**FP1017** Maximum Parsimony Tree inferred from the combined datasets of ITS and LSU sequences from species belonging to the families *Chaetothyriaceae* and *Cyphellophoraceae*, including two specimens of *Hermetothecium mikaniae-micranthae* obtained in this study (indicated in **bold**). Bootstrap support values ( $\geq 70\%$ ) and later Bayesian probabilities ( $\geq 0.90$ ) are given at each node. The tree is rooted to *Cladophialophora australiensis* CBS 112793 and *C. potulentorum* CBS 112222.
