# Supplementary material for: Fungal Planet description sheets: 951–1041
Source: PubMed Central journal article supplement — Persoonia. 2019 Dec 18;43:223–425. doi: 10.3767/persoonia.2019.43.06 (PMC7085856; doi:10.3767/persoonia.2019.43.06), 2019-12-18
Supplement: per-43-223-SF7.pdf [file per-43-223-SF7.pdf]

Fungal Planet 1018 – *Lactifluus guanensis*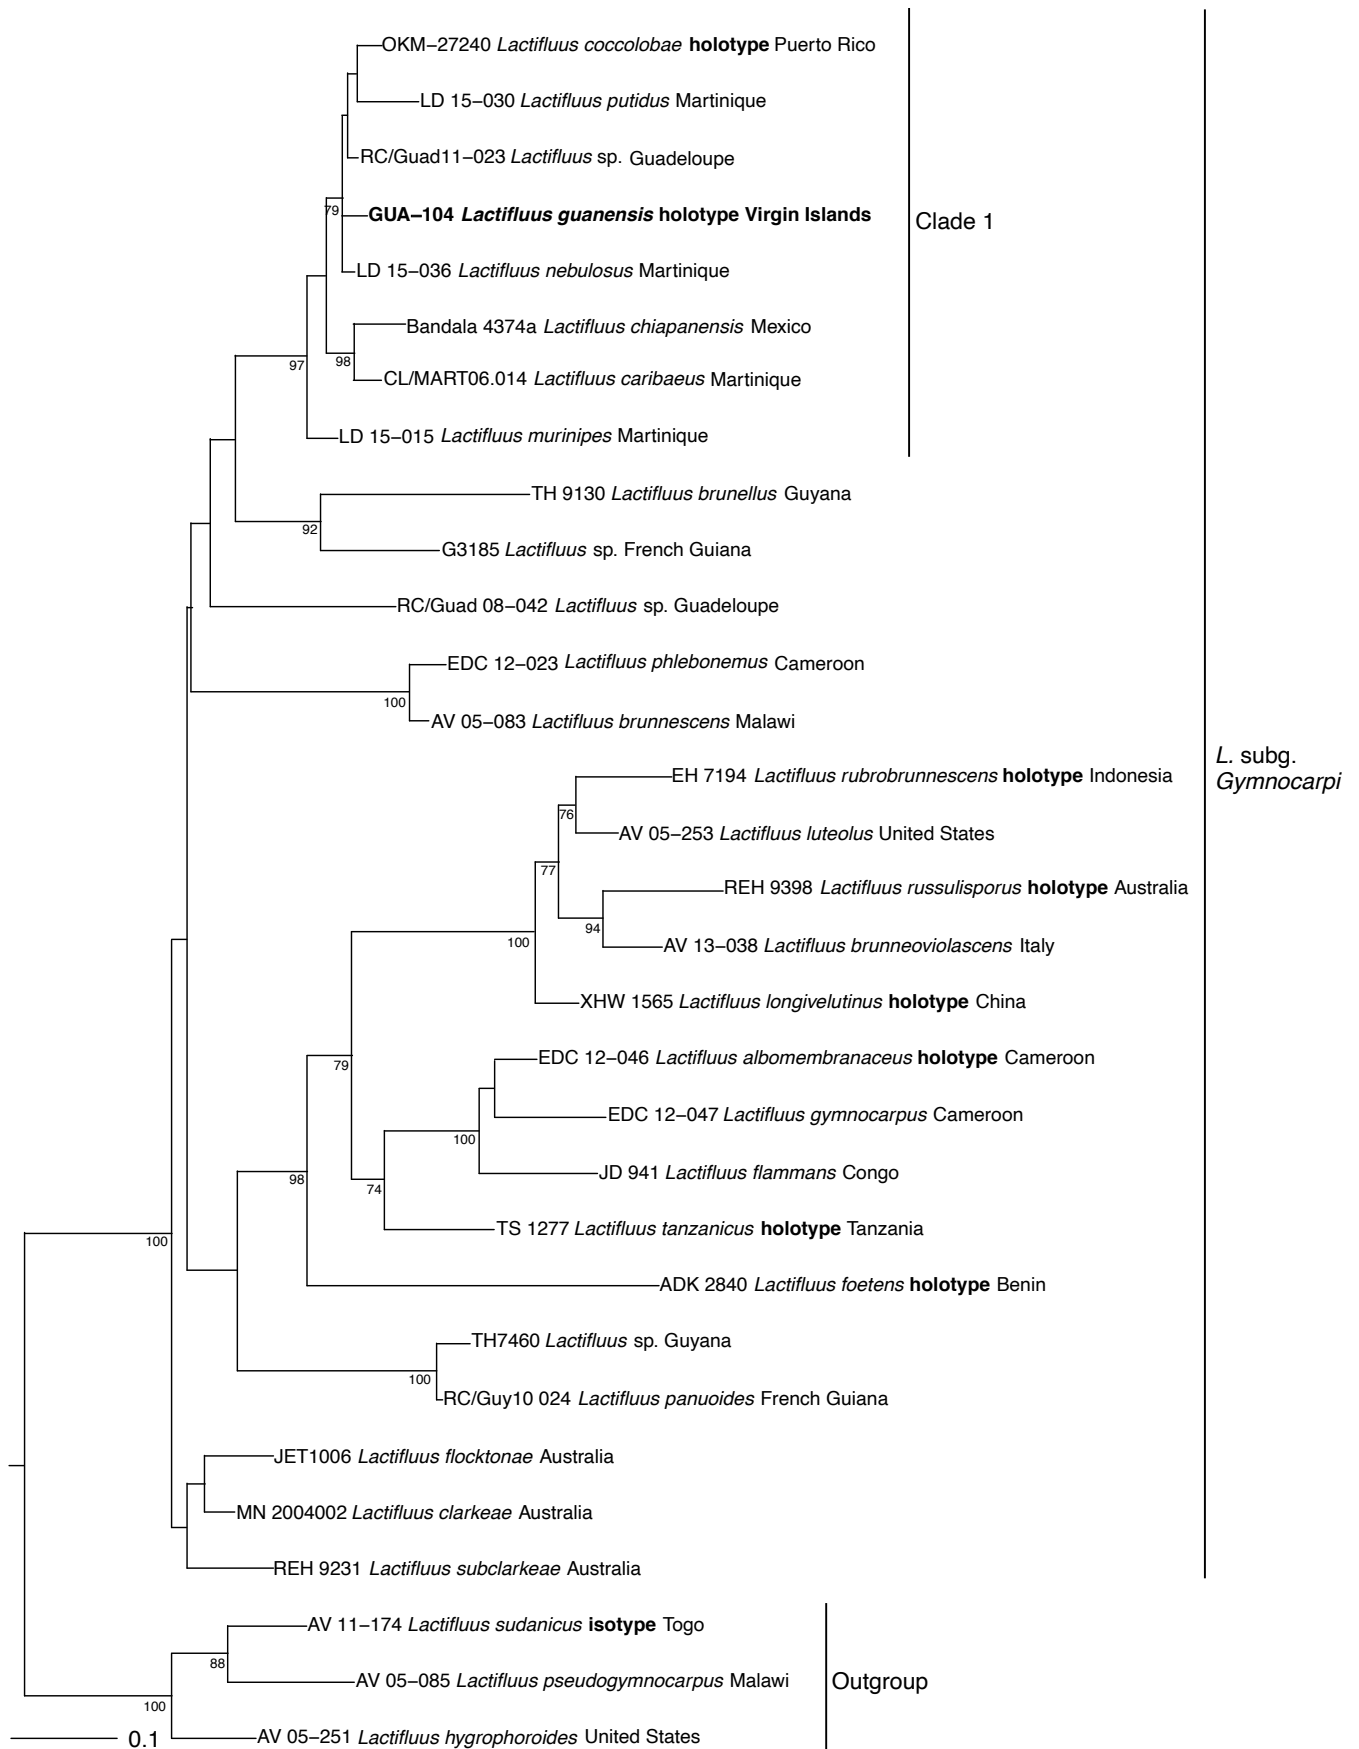FP1018 Maximum Likelihood phylogeny based on ITS sequence data of *Lactifluus* subg. *Gymnocarpi*.
