# Supplementary figures and images for: Fungal Planet description sheets: 951–1041
Source: PubMed Central journal article supplement — Persoonia. 2019 Dec 18;43:223–425. doi: 10.3767/persoonia.2019.43.06 (PMC7085856; doi:10.3767/persoonia.2019.43.06), 2019-12-18

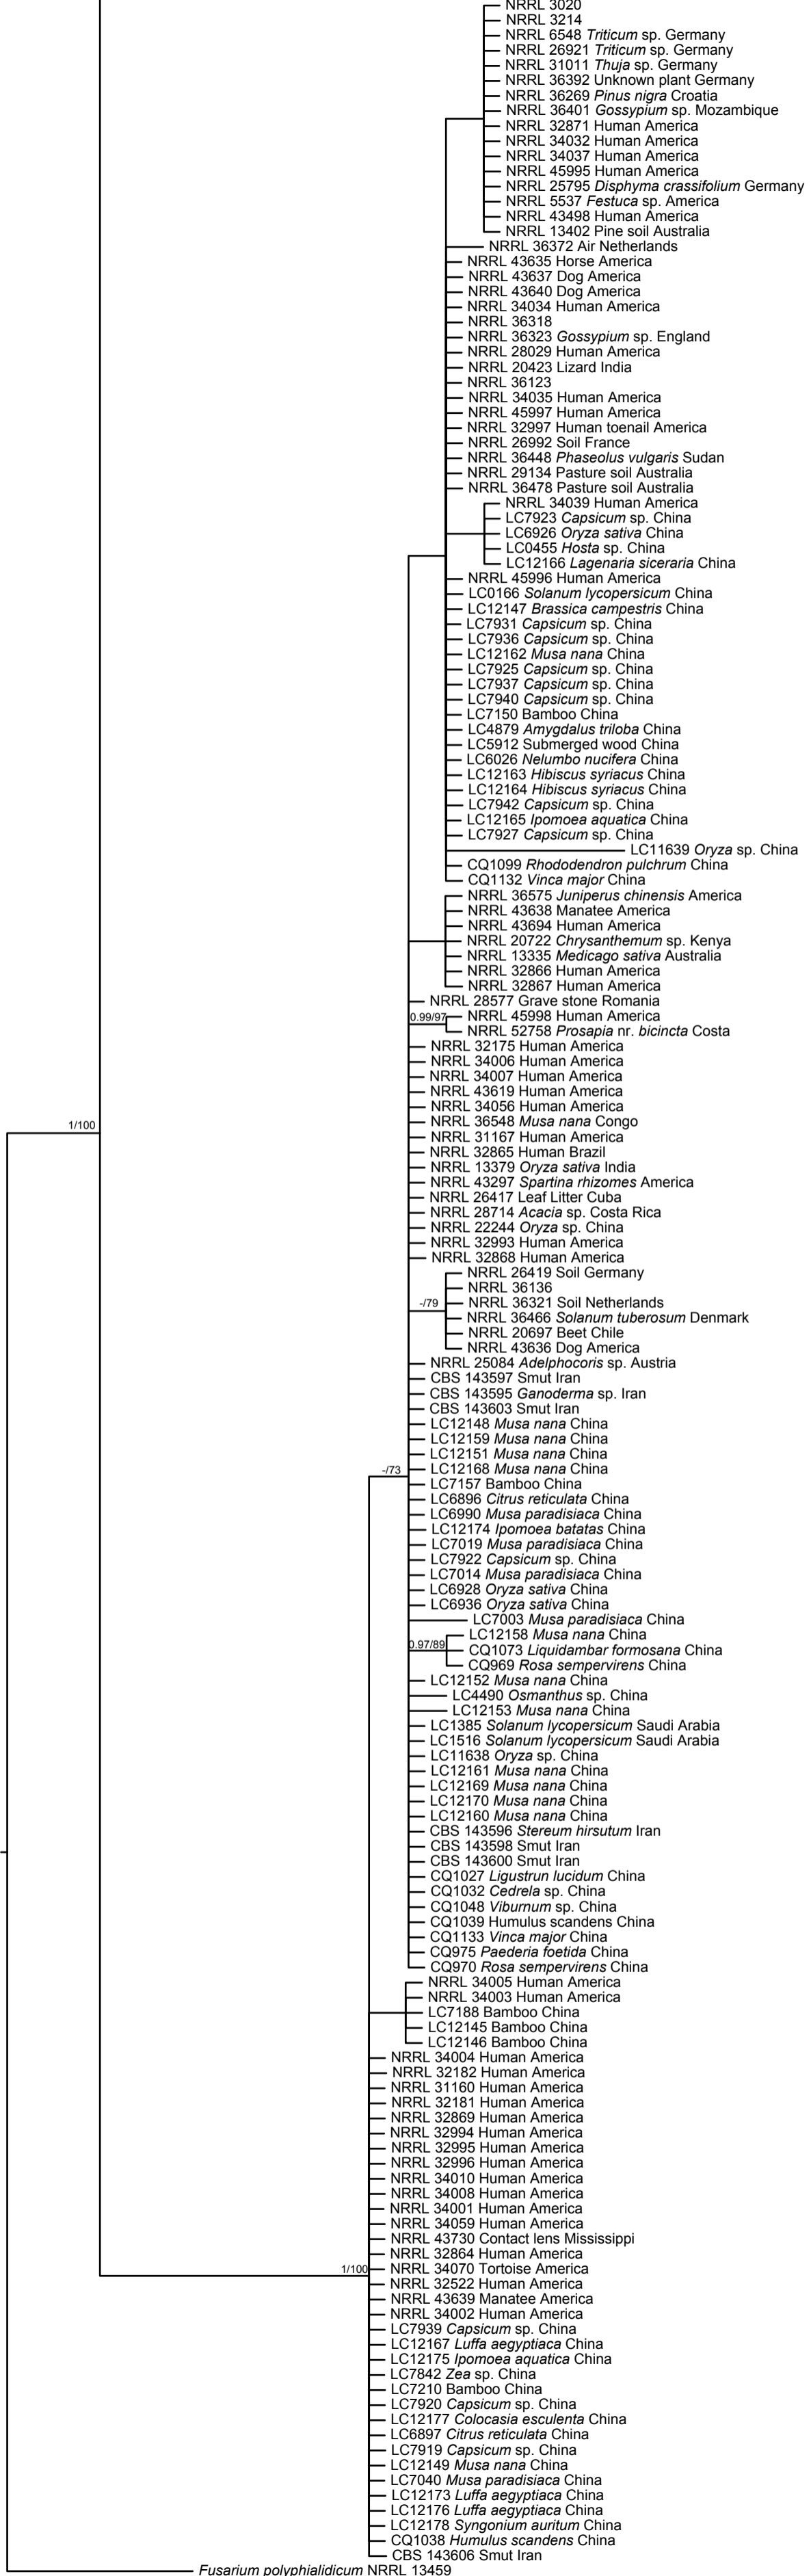

*Fusarium polyphialidicum* NRRL 13459

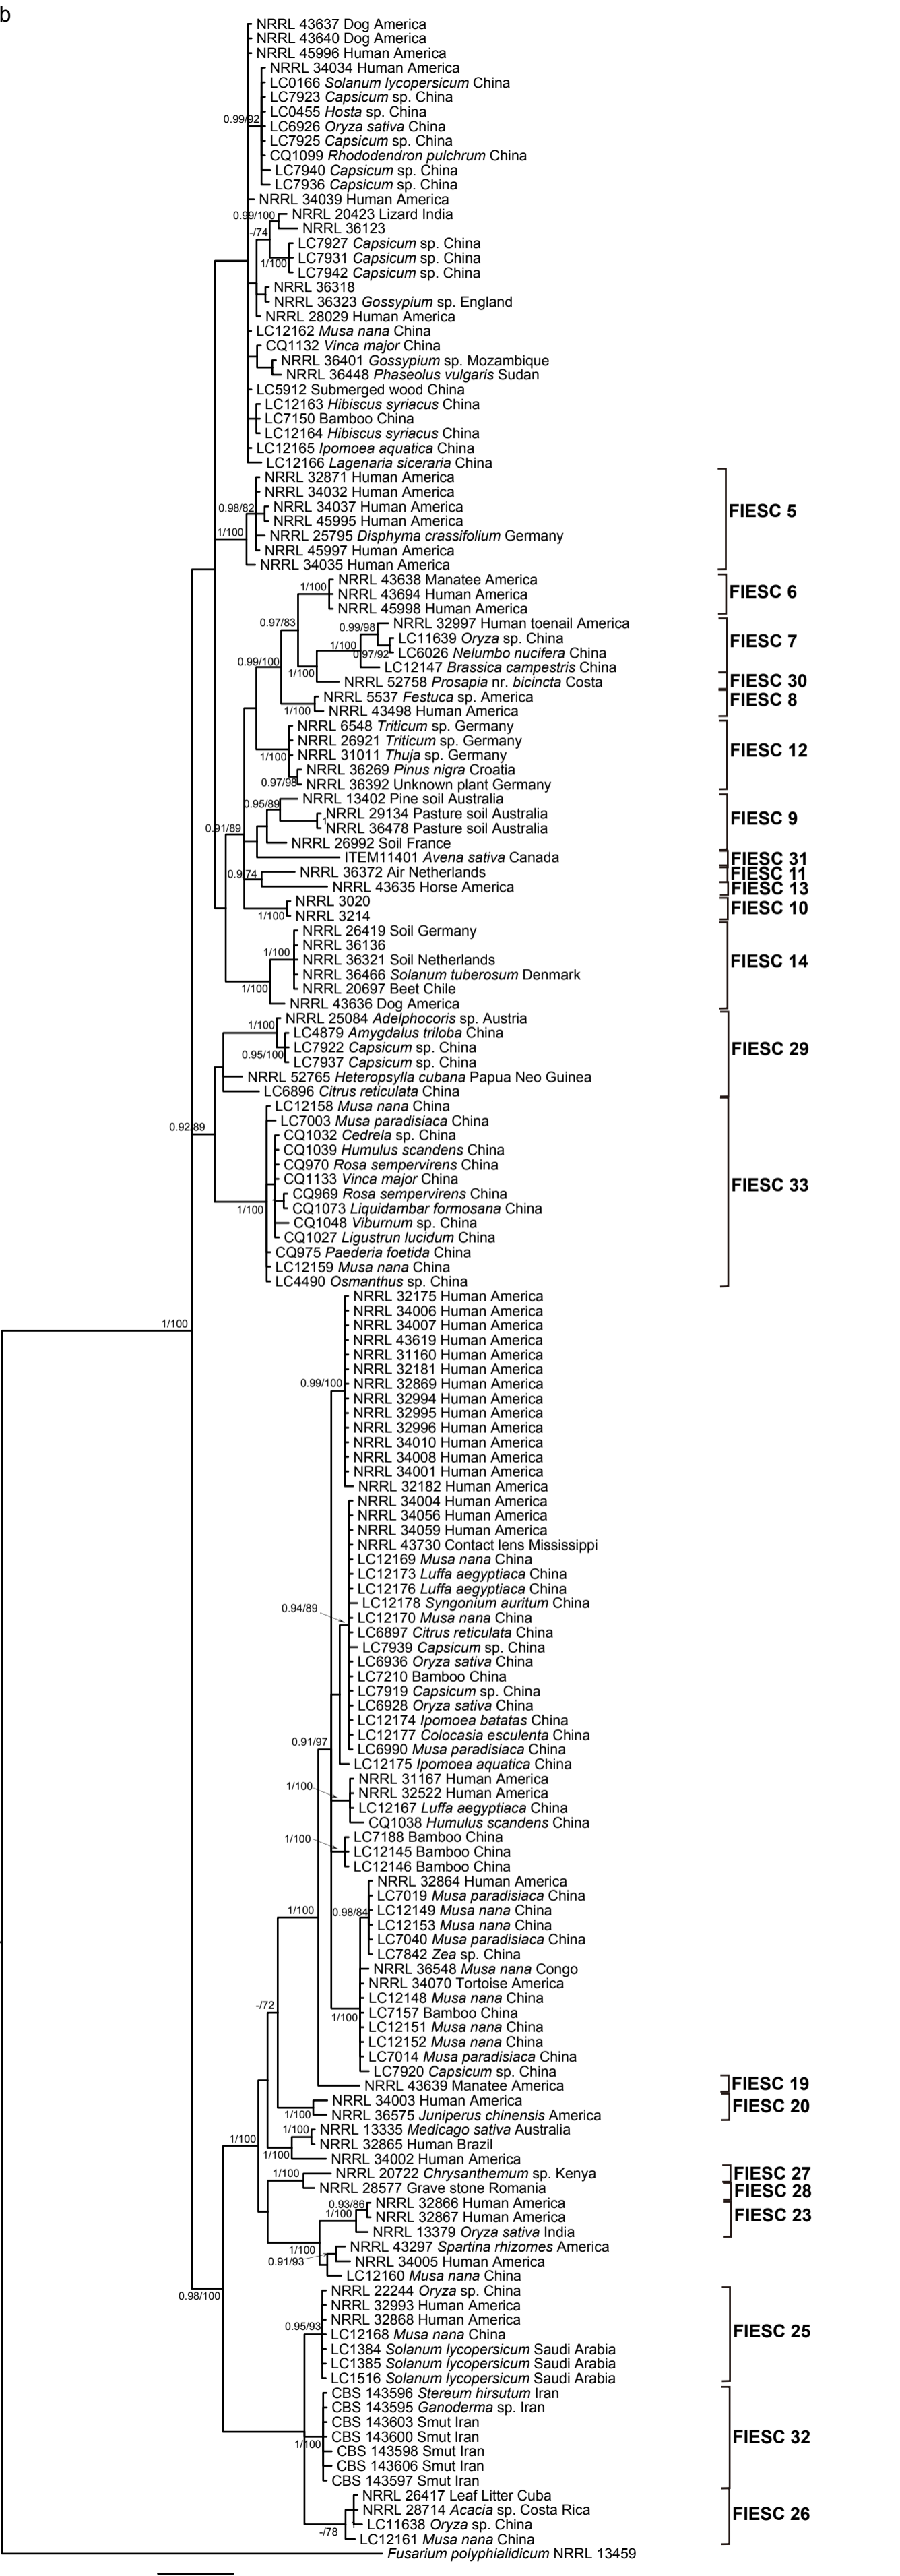

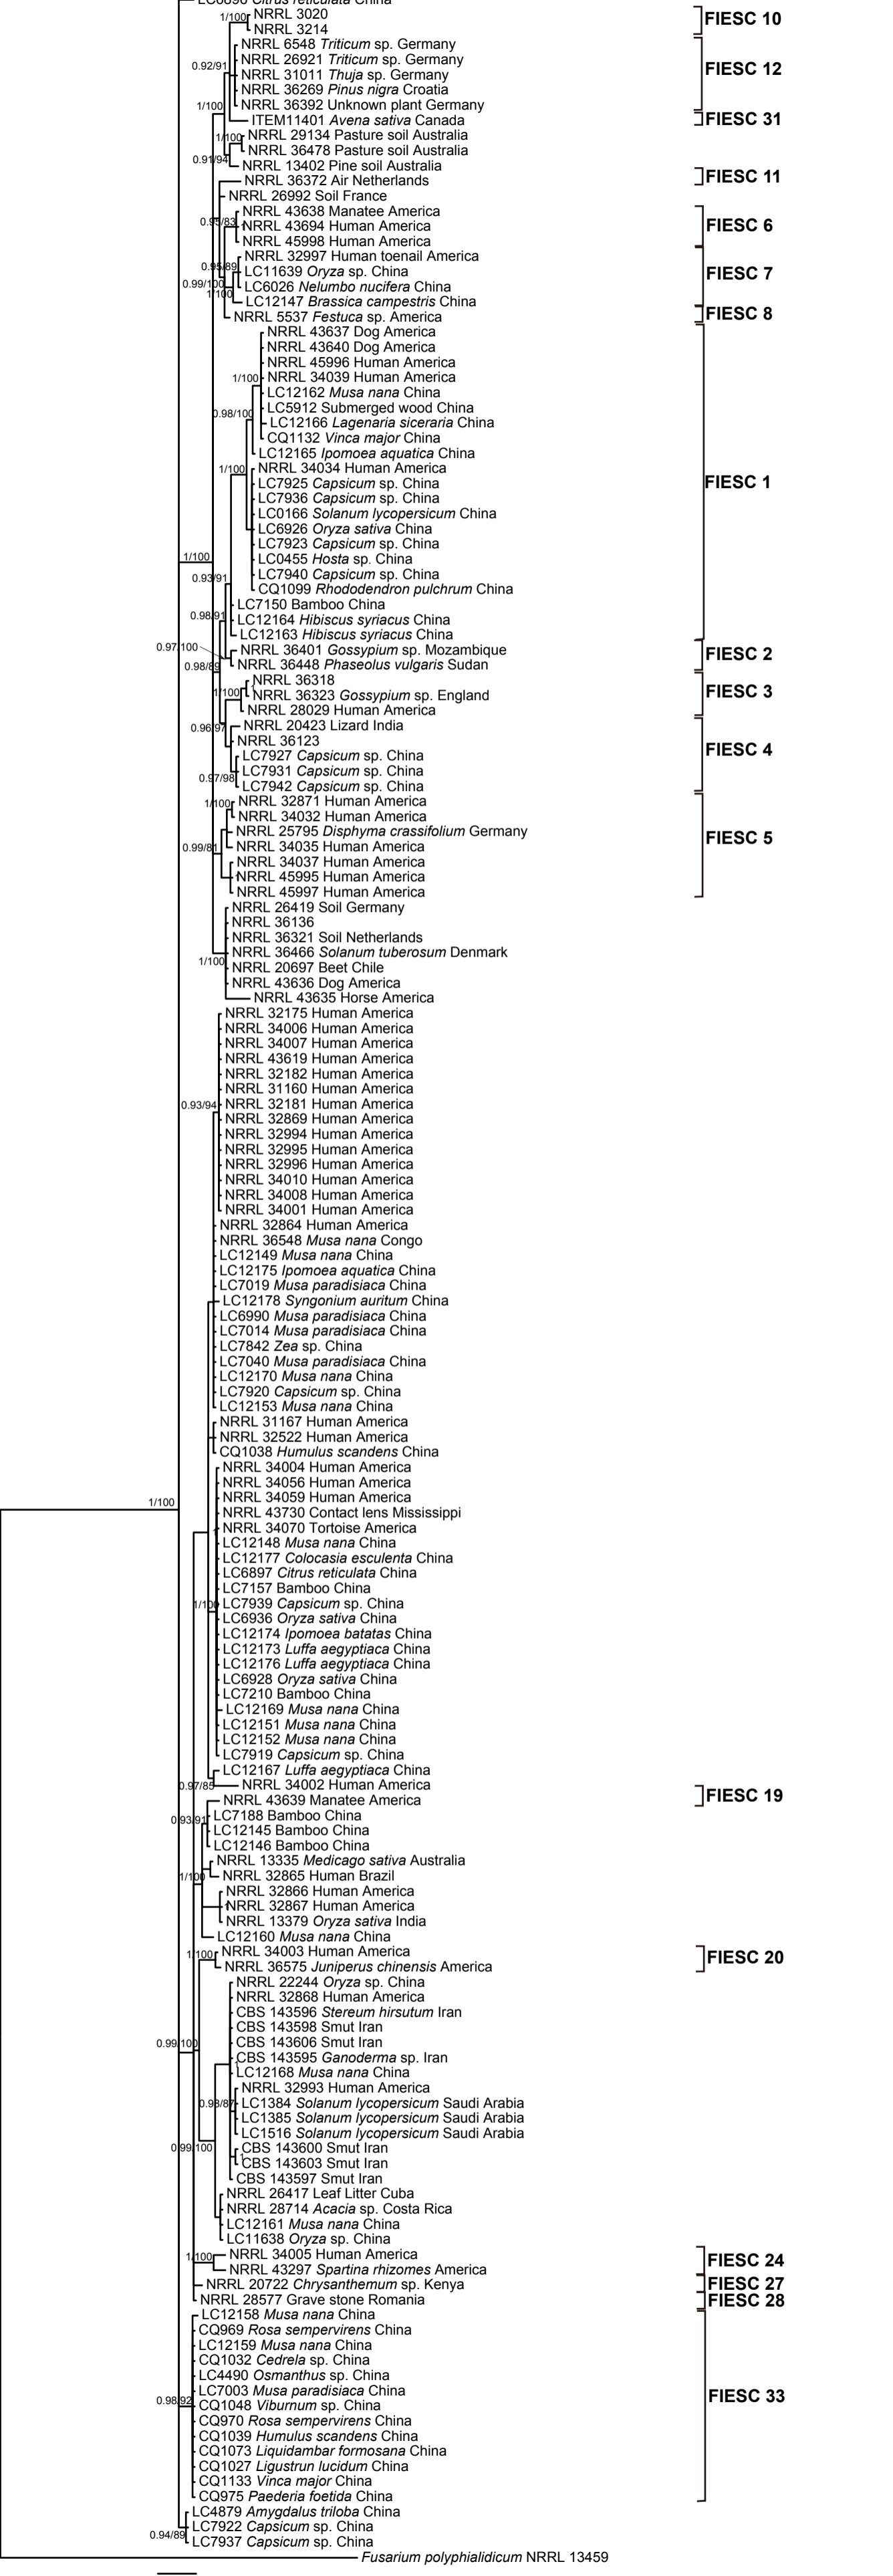

0.01

*Fusarium polyphialidicum* NRRL 13459

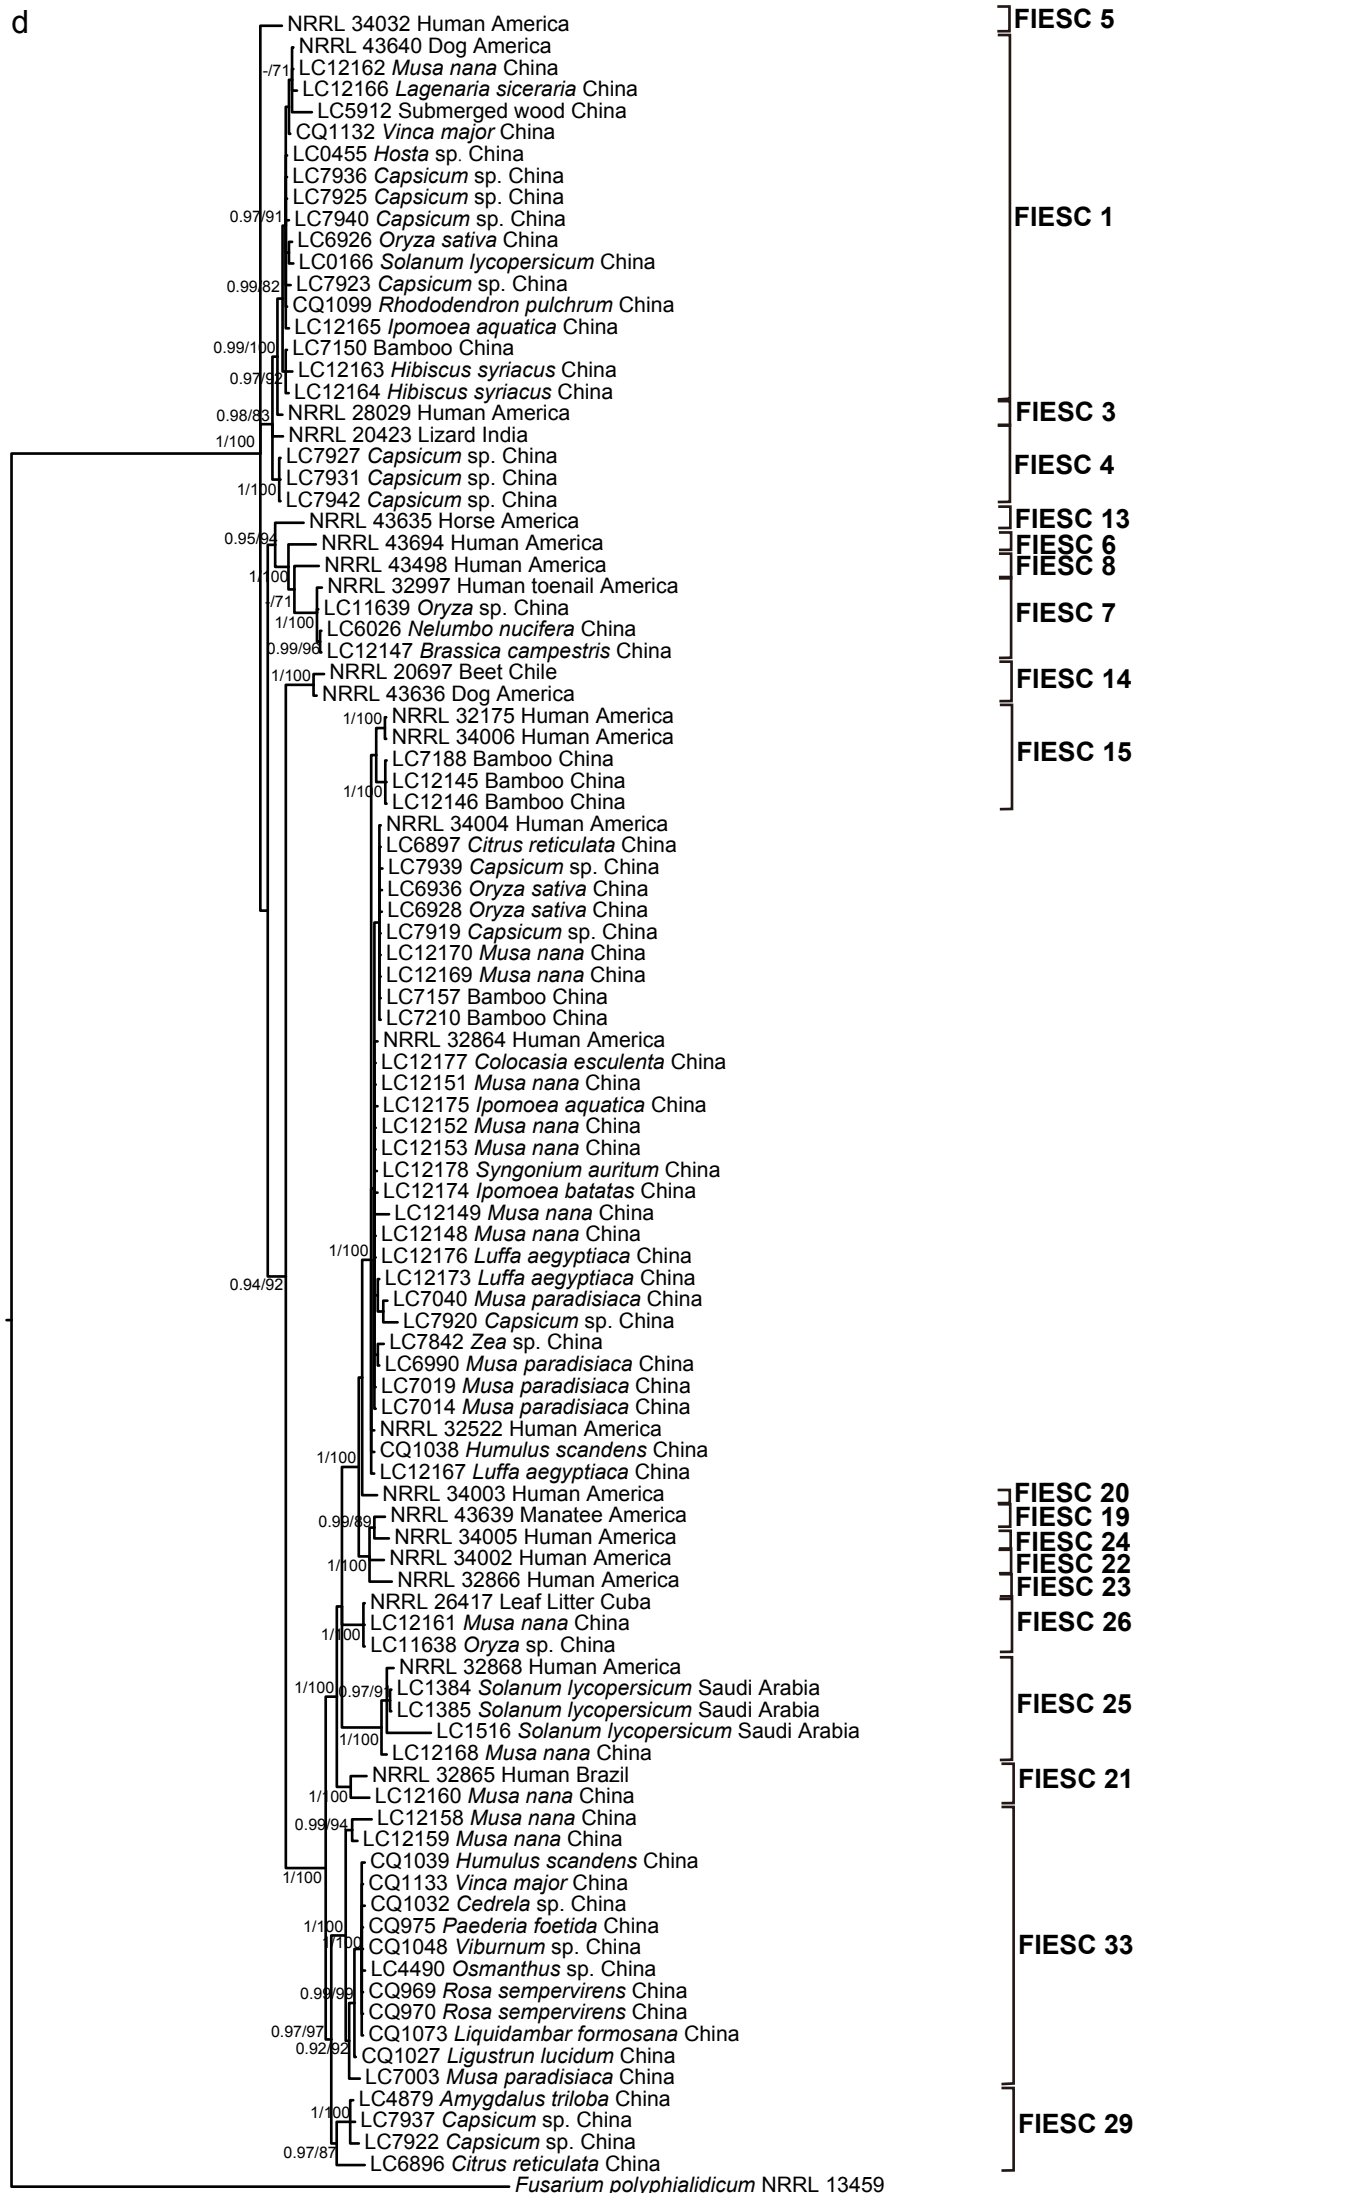

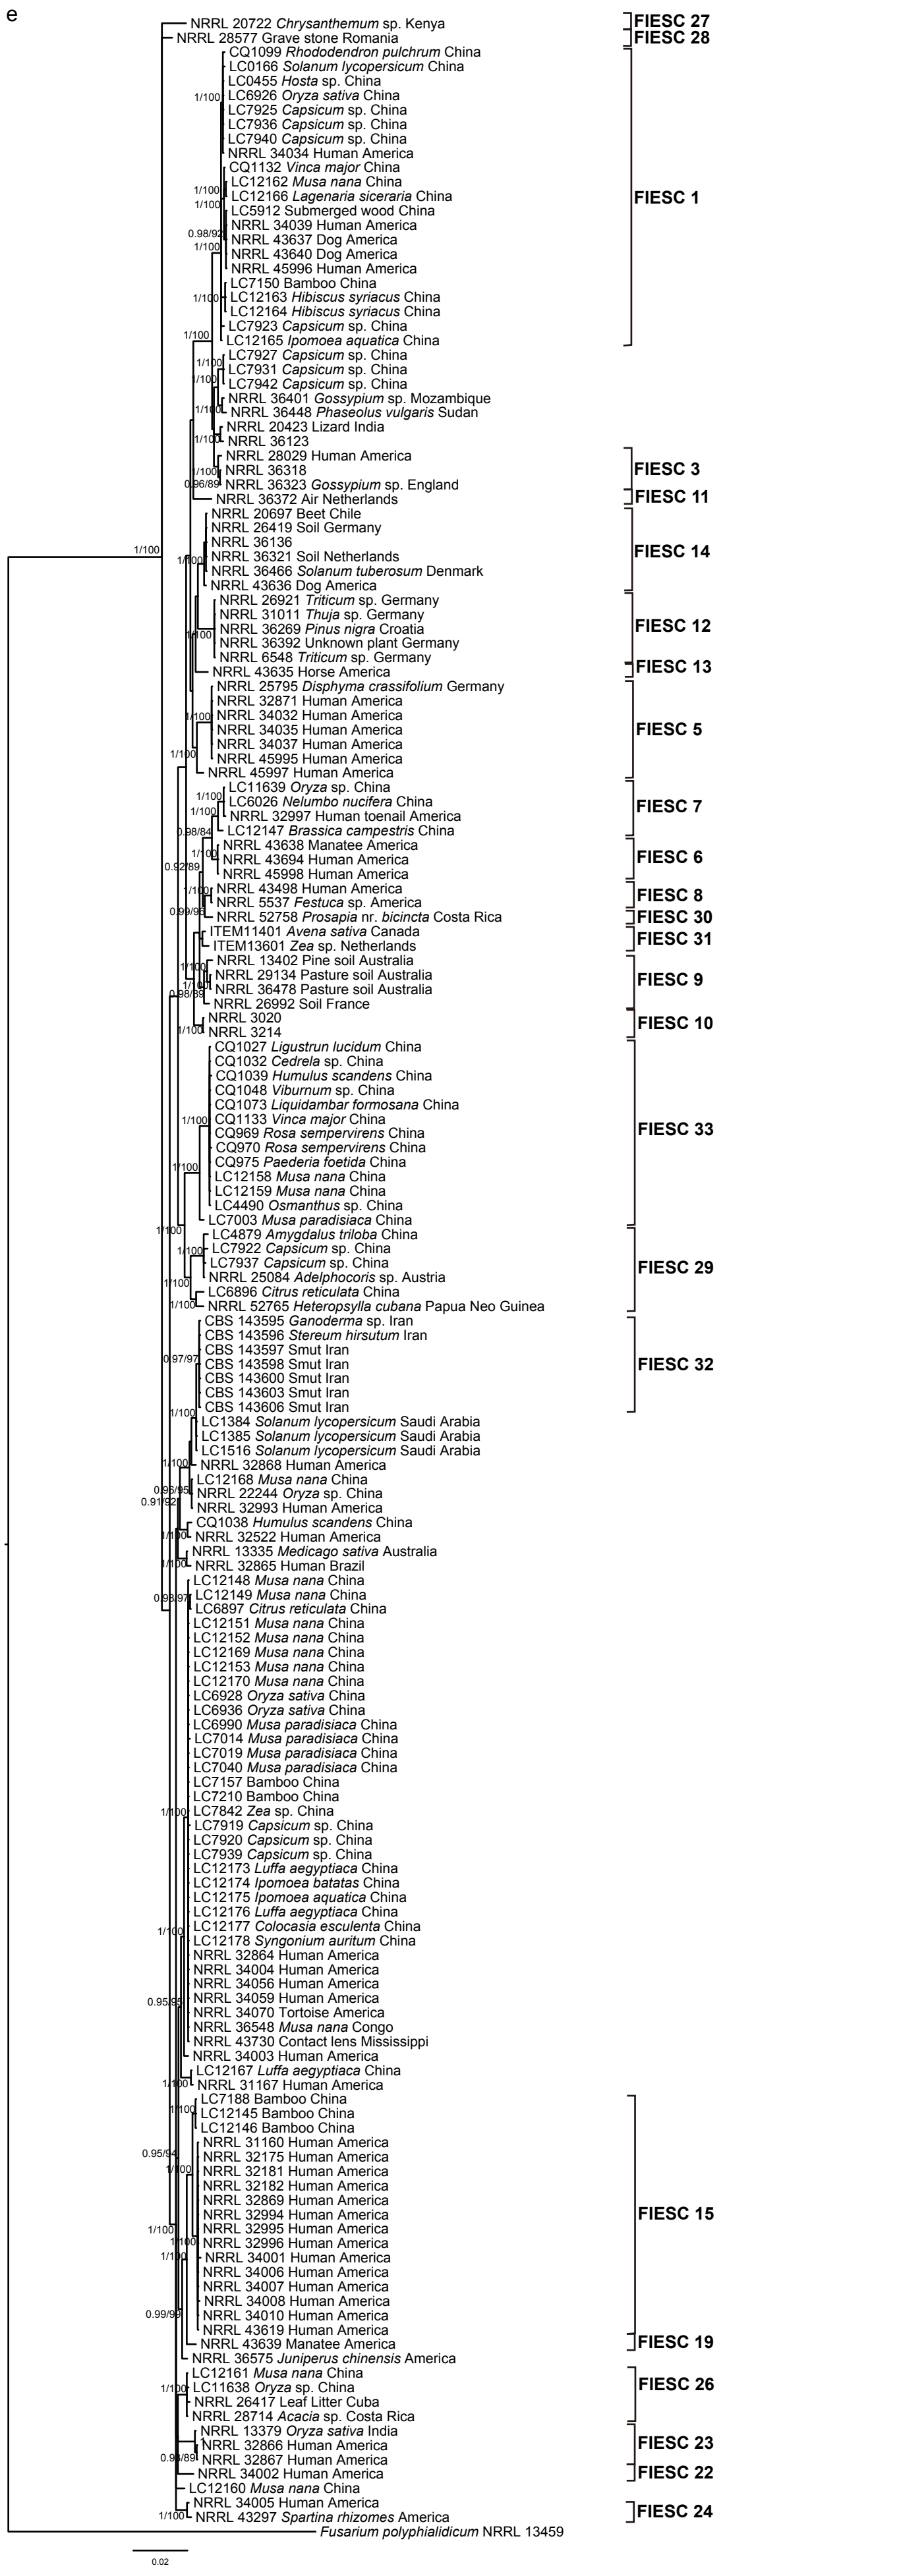

Supplement: per-43-223-SF12.pdf [file per-43-223-SF12.pdf]
